# Supplementary material for: NIR-responsive porous gold nanorod dispersed in a 3D gelatin scaffold for stimulus-responsive drug release and synergistic therapy
Source: Royal Society of Chemistry journal article supplement (doi:10.1039/d4ma00400k), 2024-01-01
Supplement: d4ma00400k1.pdf [file d4ma00400k1.pdf]

## NIR-responsive Porous Gold Nanorod Dispersed in 3D Gelatin Scaffold for Stimuli Responsive Drug Release and Synergistic Therapy

Snigdharani Panda,<sup>a</sup> Irfan Khan,<sup>a</sup> Suditi Neekhra,<sup>b</sup> Rohit Srivastava,<sup>b</sup> Sunita Srivastava<sup>\*a</sup>

### Electronic supporting Information

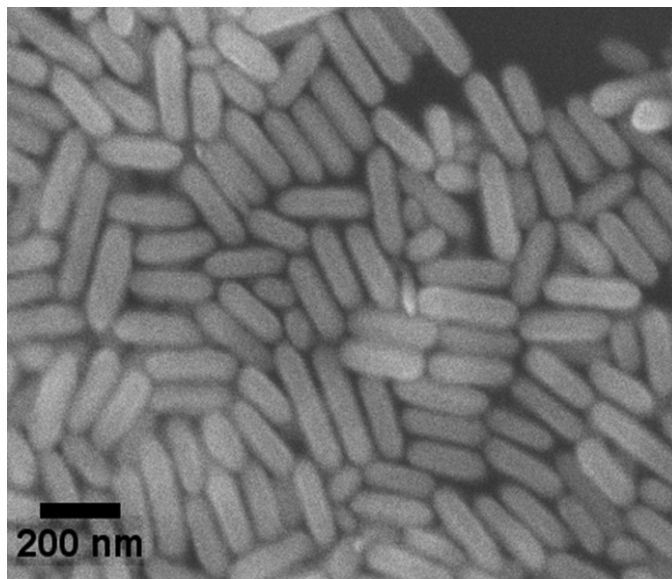

**Figure S1** FESEM image of sodium dodecyl sulphate stabilized Se-Te nanorod template.

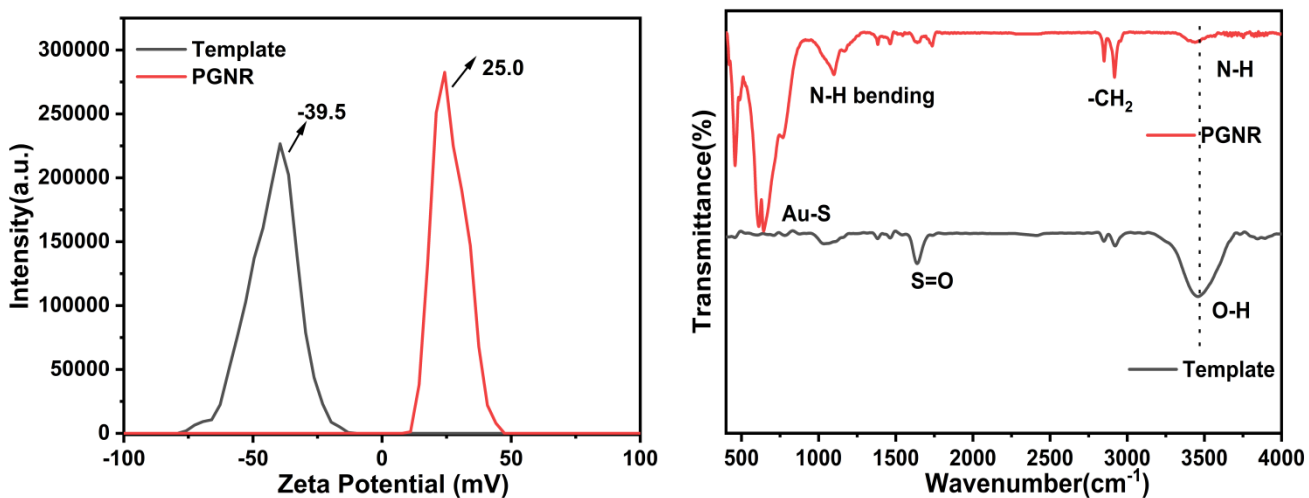

**Figure S2, S3** Comparative surface charge, FTIR spectra of aqueous dispersed Se-Te template and cysteamine functionalized PGNR.

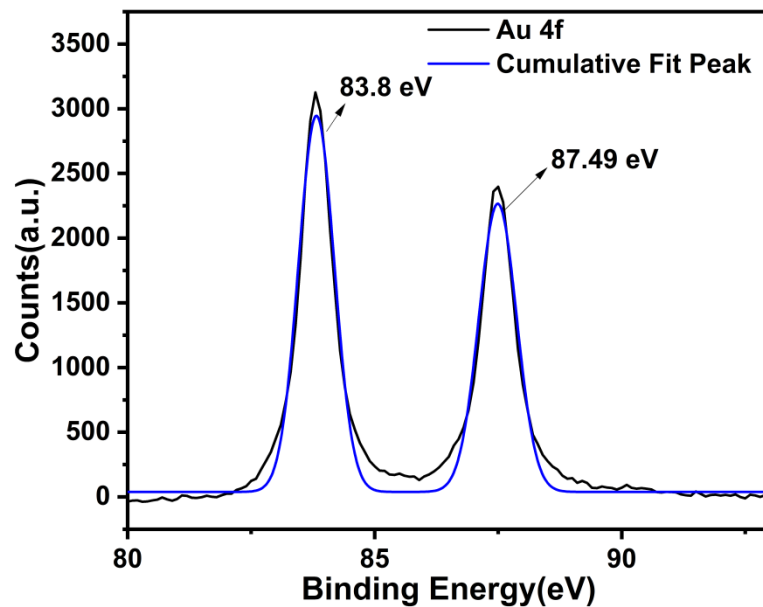

Figure S4 Deconvoluted high resolution Au 4f spectrum

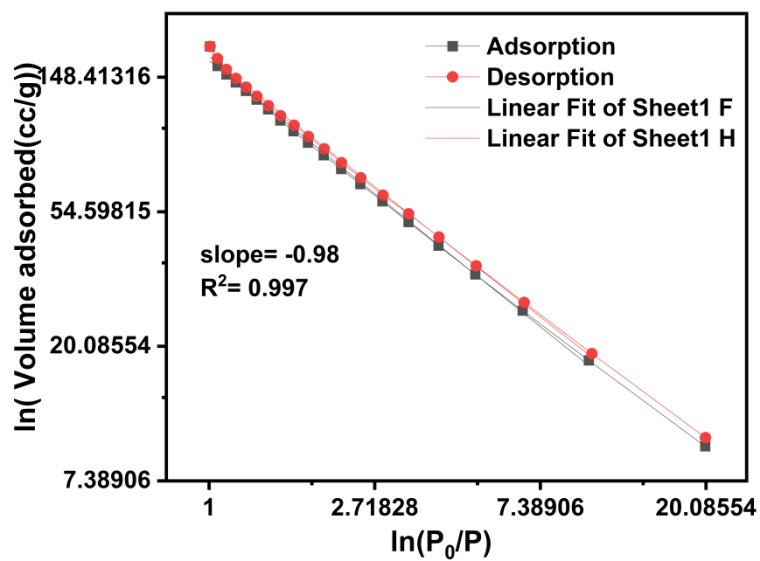

Figure S5 Linearly fitted logarithmic graph of  $N_2$  adsorption-desorption isotherm

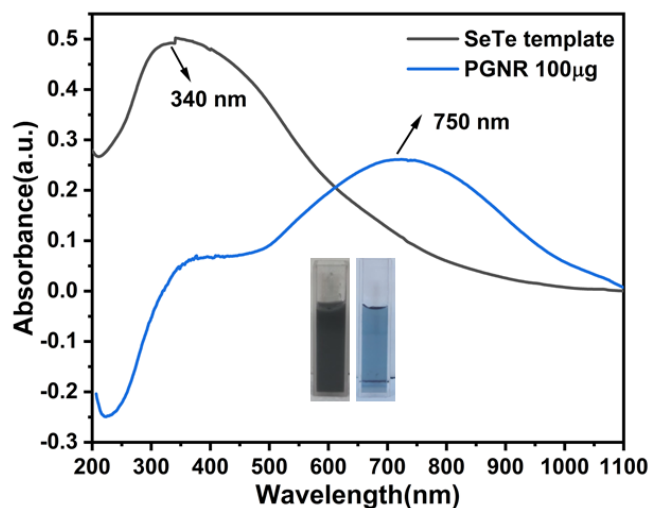

**Figure S6** UV-VIS absorption spectra of SeTe nanorod template and porous gold nanorod sample, inset: visual images of corresponding real samples in cuvette

**Table S1** Comparative report on few recently reported NIR active photothermal materials and its efficiency

| Material                                             | Laser Power                       | $\eta$ (%)   | Reference                                                            |
|------------------------------------------------------|-----------------------------------|--------------|----------------------------------------------------------------------|
| Hollow gold nanosphere                               | 808 nm,<br>1.5W/cm <sup>2</sup>   | 21.7         | ACS Appl. Mater. Interfaces <b>2017</b> , 9, 40017–40030             |
| Polydopamine                                         | 808 nm,<br>1W/cm <sup>2</sup>     | 33.4         | ACS Applied Materials & Interfaces <b>2018</b> , 10, 15, 12544-12552 |
| hollow MOF/polydopamine Janus nanoparticles          | 808 nm, 1W                        | 29.7         | Chem. Eng. Journ., <b>2019</b> , 378, 1221756                        |
| Miniature hollow gold nanorod                        | 1064 nm,<br>690mW/cm <sup>2</sup> | 34           | Small <b>2020</b> , 16, 2002748                                      |
| Hollow Ag@Au-Ce6 NPs                                 | 808 nm,<br>808mW/cm <sup>2</sup>  | <b>33.2</b>  | Biomater. Sci., <b>2023</b> , 11, 4874–4889                          |
| HAuNS@PEG-bio                                        | 1064 nm, 1W                       | <b>63</b>    | J. Mater. Chem. B, <b>2023</b> ,11, 10003-10018                      |
| Hollow octahedron Cu <sub>2</sub> -xSe nanoparticles | 1064 nm, 1W                       | <b>55.97</b> | Nanoscale, <b>2023</b> , Advance Article                             |
| Cysteamine @PGNR                                     | 750 nm,<br>1W/cm <sup>2</sup>     | <b>79.25</b> | Present study                                                        |

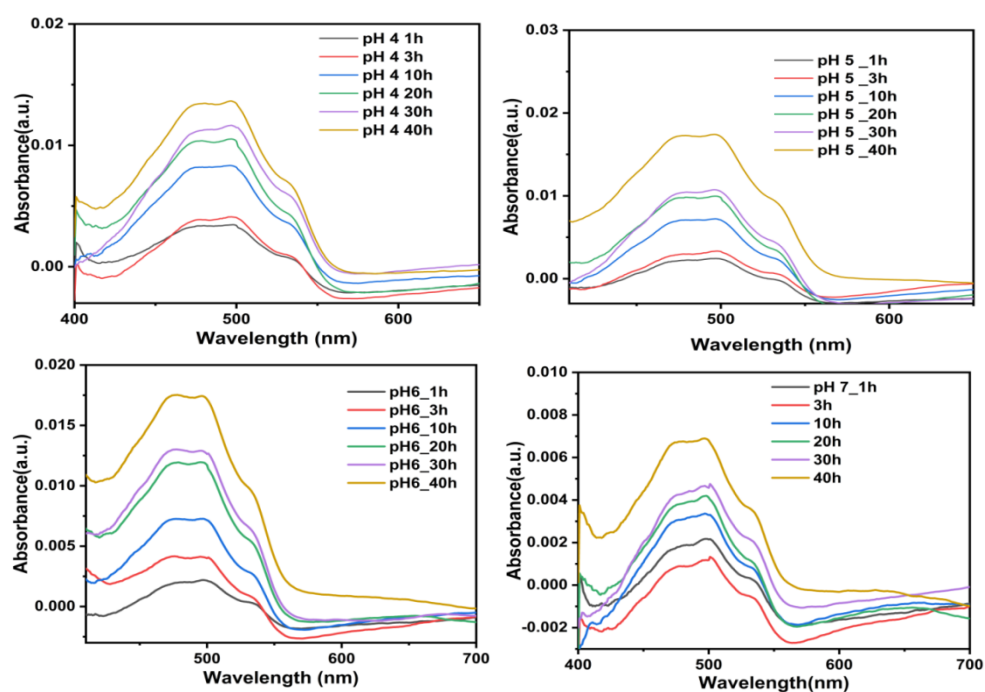

**Figure S7** Drug release profile with respect to time for pH 4, 5, 6 and 7

**Table S2-** Comparative DOX loading capability and encapsulation efficiency in different porous and nonporous material

| Porous Nanostructure                                                          |                 |                                       |                | Non-porous Nanostructure                                                                         |                 |                              |              |
|-------------------------------------------------------------------------------|-----------------|---------------------------------------|----------------|--------------------------------------------------------------------------------------------------|-----------------|------------------------------|--------------|
| Material                                                                      | DOX loading (%) | Encapsulation Efficiency (%)          | Release (%)    | Material                                                                                         | DOX loading (%) | Encapsulation efficiency (%) | Release (%)  |
| Mesoporous carbon @V <sub>2</sub> O <sub>5</sub> (Langmuir 2024, 40, 6471–64) | Not given       | 88.0                                  | 78.0% in 60min | Self-assembled cyclodextrin conjugated gold nanocluster (J. Mater. Chem. B, 2024, 12, 3521–3532) | 2.9             | 92.2                         | 63.0 in 24h  |
| Chitosan stabilized gold core-shell (Adv. Therap. 2024, 7, 2300165)           | 6.5             | 87.0                                  | 91.0% in 48h   | Thiolated-PEG-DOX conjugated gold nanoparticle (ACS Appl. Mater. Interfaces 2017, 9, 8569–8580)  | Not given       | 27.3                         | 91.8 in 132h |
| Polylactide-co-glycolide (PLG) nanoparticle (Small 2023, 2306726)             | Not given       | (76.0-89.0) Varies with particle size | 40% in 20 min  | Fe <sub>3</sub> O <sub>4</sub> -BCD-Pep42 (ACS Appl. Bio Mater. 2023, 6, 1019–1031)              | 5.37            | 41.38                        | 49.0 in 120h |
| Porous silica coated gold nanorod (ACS Appl. Bio Mater. 2023, 6, 1915–1933)   | 30.0            | 93.9                                  | 90.0% in 6h    | Polymeric nanoparticle conjugated DOX (mPEG-b-PPLGFc@Dox) (Small 2023, 19,                       | 9.1             | 90.5                         | 80.0 in 72h  |

|                                                                                                 |      |      |                |                                                       |           |      |                                 |
|-------------------------------------------------------------------------------------------------|------|------|----------------|-------------------------------------------------------|-----------|------|---------------------------------|
|                                                                                                 |      |      |                | 2205024)                                              |           |      |                                 |
| Porous calcite microsphere (Colloids and Surfaces B: Biointerfaces 2020, 186, 110720)           | 11.0 | 95.0 | 56% in 21 days | PAA-PEG-GNRs@DOX (Dalton Trans., 2011, 40, 9789–9794) | Not given | 51.0 | 50.0 in 45 min (acetate buffer) |
| PEI nanogel-ultrasmall Fe <sub>3</sub> O <sub>4</sub> NP (Bioconjugate Chem. 2020, 31, 907–915) | 21.9 | 51.4 | 44.0% in 72h   |                                                       |           |      |                                 |
| PGNR (Present work)                                                                             | 10.0 | 99.0 | 72% in 120 min |                                                       |           |      |                                 |

**Table S3** Comparative IC-50 value for free DOX, PGNR material and DOX loaded therapeutic material

| Sample                   | IC50 value(µg/mL)                               |
|--------------------------|-------------------------------------------------|
| Doxorubicin (literature) | 13.76                                           |
| Free Dox(our finding)    | 20                                              |
| PGNR+NIR                 | 100                                             |
| PGNR-DOX-gel +NIR        | 20 (2 µg free DOX present in 20µg PGNR-DOX-gel) |

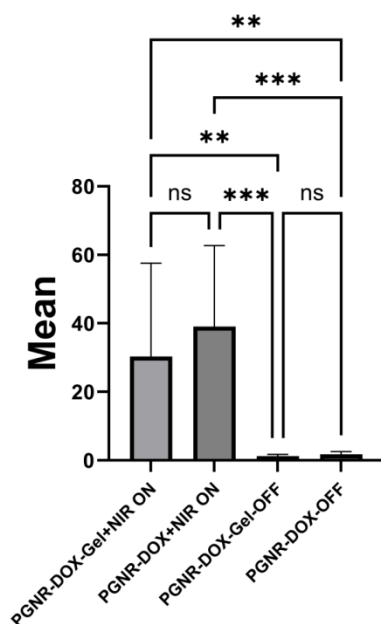

**Figure S8** Statistically significant difference in drug release is shown as mean ± S.E. under laser ON and OFF condition (where \*\* is p=0.0024, \*\*\* is p= 0.0001, ns is non-significant)

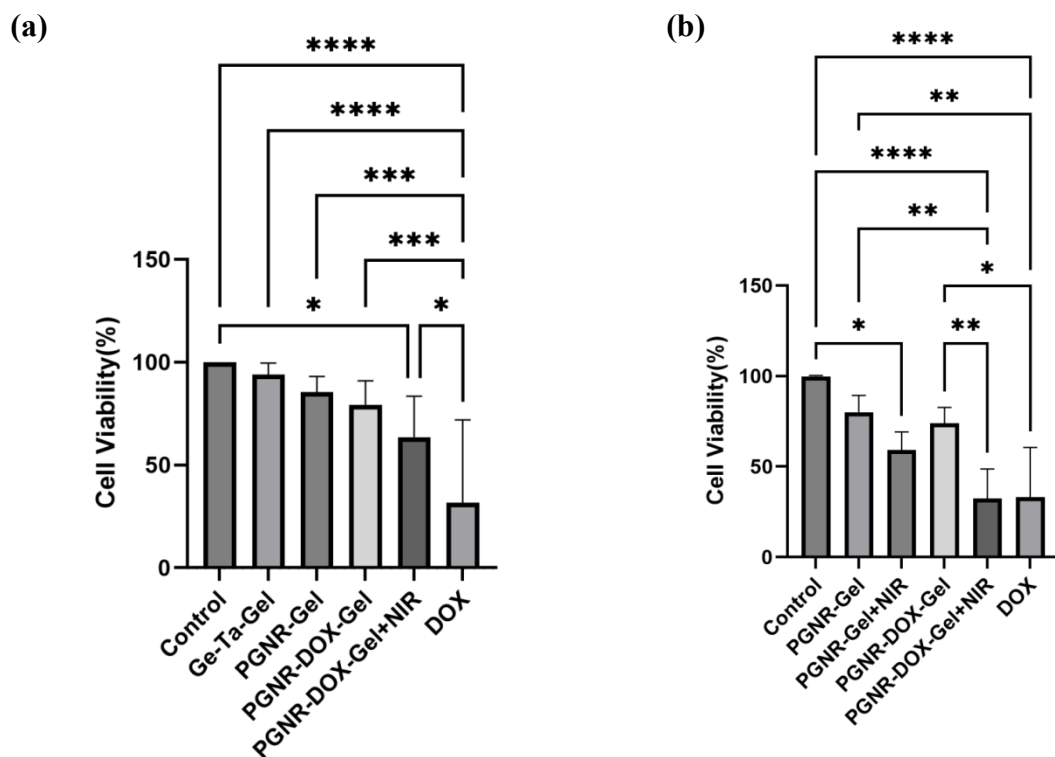

**Figure S9** Statistical analysis of the cell viability study obtained from almarBlue assay on (a) L929 cells (b) HeLa cells (\* is  $p = 0.0138$ , \*\* is  $p = 0.0026$ , \*\*\* is  $p = 0.0001$ , \*\*\*\* is  $p < 0.0001$ )

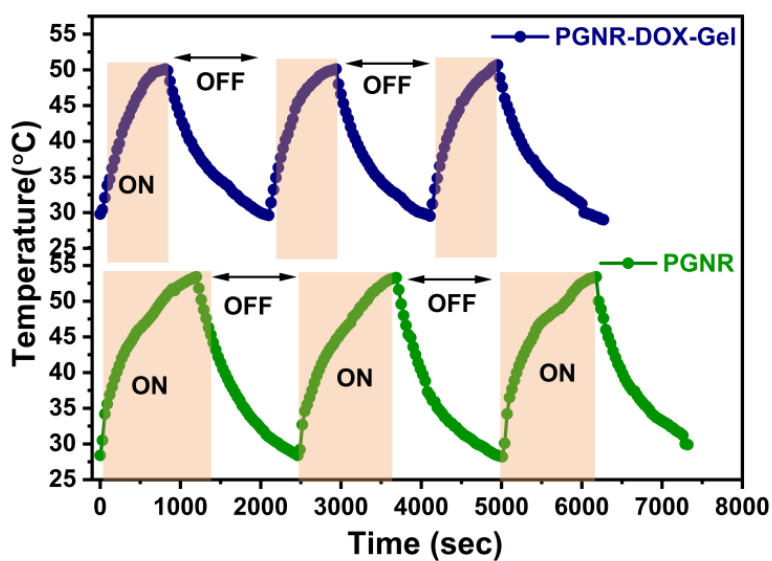

**Figure S10** Photothermal stability of PGNR and PGNR-DOX-Gel after 3 consecutive cycles of laser ON and OFF (750 nm, 1W power)

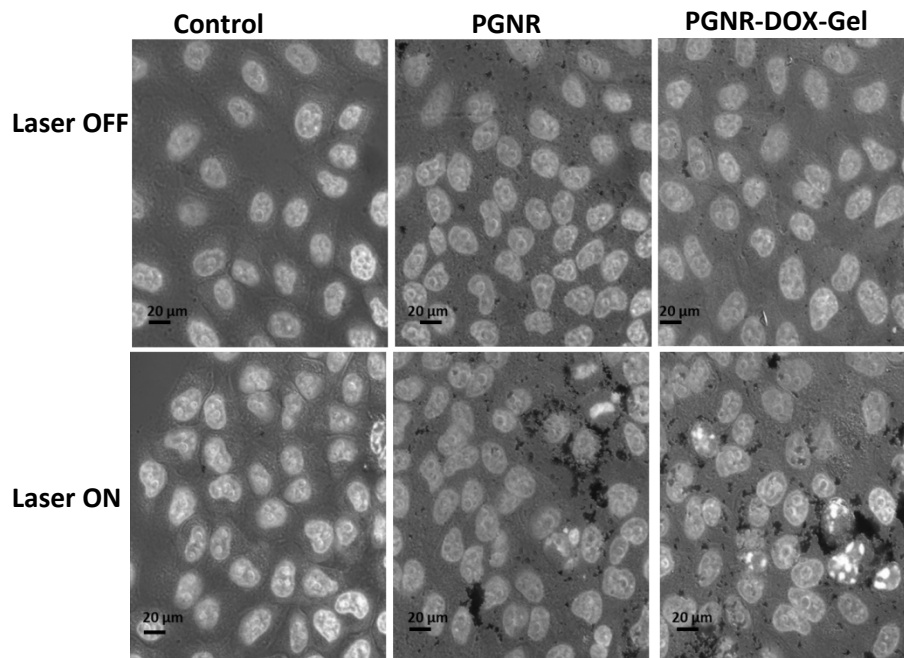

**Figure S11** Bright field images of Laser scanning confocal microscopy (corresponds to figure 7)
